# Supplementary material
Source: Elsevier journal article supplement (https://comptes-rendus.academie-sciences.fr/geoscience/article/10.1016/j.crte.2015.02.008/file/attach/mmc1.pdf)
Supplement: mmc1 [file mmc1.pdf]

Table A1. Major and trace element concentrations for the ACEX composite core

| Sample 302-2A-         | depth<br>(mcd) | SiO2<br>% | Al2O3<br>% | Fe2O3<br>% | MnO<br>% | MgO<br>% | CaO<br>% | Na2O<br>% | K2O<br>% | TiO2<br>% | P2O5<br>% | Total<br>% |
|------------------------|----------------|-----------|------------|------------|----------|----------|----------|-----------|----------|-----------|-----------|------------|
| 302-2a-1X-1W-2-3cm     | 1.25           | 51.41     | 15.18      | 6.83       | 0.55     | 2.48     | 2.87     | 2.95      | 2.90     | 0.73      | 0.20      | 86.09      |
| 1X 1W 12-13 cm         | 1.35           | 58.71     | 14.55      | 6.23       | 0.41     | 2.22     | 1.99     | 2.66      | 2.82     | 0.71      | 0.19      | 90.48      |
| 11X 2W 75-76 cm        | 50.69          | 60.49     | 16.05      | 7.28       | 0.07     | 1.70     | 0.57     | 2.69      | 3.04     | 0.78      | 0.27      | 92.93      |
| 23X 2W 22-23 cm        | 101.55         | 57.93     | 16.21      | 8.55       | 0.08     | 1.67     | 0.47     | 2.37      | 2.84     | 0.77      | 0.32      | 91.18      |
| 34X 2W 22-23 cm        | 150.72         | 62.42     | 16.75      | 5.36       | 0.12     | 1.54     | 0.43     | 2.53      | 3.00     | 0.79      | 0.15      | 93.08      |
| 35X 2W 18-19cm         | 154.45         | 56.68     | 16.65      | 6.52       | 0.33     | 1.55     | 0.39     | 2.20      | 2.89     | 0.77      | 0.22      | 88.20      |
| 37X- 2W 27-28cm        | 164.28         | 55.24     | 16.00      | 8.39       | 0.11     | 1.37     | 0.34     | 1.99      | 2.47     | 0.71      | 0.33      | 86.94      |
| 38X 2W 27-28cm         | 167.16         | 56.48     | 16.26      | 8.04       | 0.19     | 1.42     | 0.48     | 2.24      | 2.53     | 0.70      | 0.30      | 88.65      |
| 40X 2W 27-28cm         | 174.85         | 54.99     | 17.21      | 8.08       | 1.10     | 1.54     | 0.40     | 2.18      | 2.89     | 0.77      | 0.26      | 89.42      |
| 42X 2W 27-28cm         | 184.26         | 55.13     | 16.90      | 7.66       | 1.29     | 1.55     | 0.45     | 2.43      | 3.04     | 0.75      | 0.25      | 89.44      |
| 43X 2W 22-23 cm        | 189.20         | 56.91     | 16.87      | 7.67       | 1.28     | 1.47     | 0.45     | 2.42      | 3.00     | 0.73      | 0.30      | 91.10      |
| 44X 3W 60-61 cm        | 189.58         | 58.80     | 15.74      | 5.22       | 0.04     | 1.72     | 0.30     | 1.79      | 2.88     | 0.64      | 0.08      | 87.20      |
| 44X 1W 76-77 cm        | 192.75         | 52.45     | 16.43      | 10.99      | 1.03     | 1.40     | 0.49     | 2.10      | 2.81     | 0.73      | 0.55      | 88.98      |
| 44X 2W 95-96 cm        | 194.44         | 59.16     | 18.16      | 5.32       | 0.04     | 1.30     | 0.33     | 1.88      | 2.94     | 0.66      | 0.12      | 89.91      |
| 44X 1W 106-107 cm      | 194.44         | 54.26     | 16.58      | 5.34       |          | 1.48     | 0.78     | 1.98      | 2.99     | 0.74      | 0.24      | 84.40      |
| 45X 1W 3-4 cm          | 195.96         | 60.70     | 14.91      | 5.37       | 0.05     | 1.55     | 0.31     | 1.69      | 2.77     | 0.63      | 0.08      | 88.07      |
| 45X 1W 57-58 cm dup. b | 196.5          | 48.82     | 12.66      | 4.42       | 0.04     | 1.35     | 0.41     | 1.78      | 2.26     | 0.52      | 0.09      | 72.35      |
| 45X 1W 57-58 cm dup. b | 196.5          | 56.06     | 14.63      | 4.10       | 0.04     | 1.45     | 0.43     | 1.78      | 2.61     | 0.59      | 0.09      | 81.80      |
| 45X 1W 110-111 cm      | 197.03         | 60.72     | 14.42      | 4.37       | 0.04     | 1.58     | 0.41     | 1.89      | 2.79     | 0.62      | 0.09      | 86.93      |
| 46X 2W 131-132 cm dup. | 199.81         | 41.33     | 10.66      | 18.15      | 0.03     | 0.90     | 0.30     | 1.51      | 2.22     | 0.46      | 0.06      | 75.61      |
| 46X 2W 132-133 cm      | 199.82         | 36.23     | 8.75       | 21.69      | 0.03     | 0.80     | 0.29     | 1.42      | 1.80     | 0.39      | 0.06      | 71.45      |
| 48X 2W 21-22 cm        | 208.41         | 36.73     | 9.89       | 19.44      | 0.05     | 1.34     | 0.27     | 1.39      | 1.46     | 0.44      | 0.08      | 71.08      |
| 51X 2W 6-7 cm          | 220.00         | 55.88     | 7.02       | 5.43       | 0.10     | 0.95     | 0.34     | 2.64      | 1.13     | 0.34      | 0.08      | 73.91      |
| 54X 1W 22-23 cm        | 230.22         | 57.07     | 5.35       | 4.26       | 0.10     | 0.82     | 0.29     | 2.57      | 0.71     | 0.24      | 0.10      | 71.52      |
| 56X 2W 95-96 cm        | 241.18         | 60.34     | 6.63       | 5.36       | 0.09     | 0.84     | 0.60     | 2.12      | 1.00     | 0.31      | 0.37      | 77.66      |
| 58X 2W 60-61 cm        | 252.00         | 57.02     | 4.57       | 5.07       | 0.09     | 0.68     | 0.31     | 2.22      | 0.62     | 0.19      | 0.13      | 70.91      |
